# Supplementary material for: Inflammasome activation in infected macrophages drives COVID-19 pathology
Source: PubMed Central journal article supplement (PMC9288243; doi:10.1038/s41586-022-04802-1), 2022-04-28
Supplement: NIHMS1809392-supplement-Supplementary_Table_5.pdf [file NIHMS1809392-supplement-Supplementary_Table_5.pdf]

**Supplementary Table 5. Patient specimens used for immunofluorescent (IF) staining.**

| Case                  | Age | Gender | Medication                   | Death (dps) | Co-morbidities                                                 | Cause of death                                      | Histopathological findings                                                         |
|-----------------------|-----|--------|------------------------------|-------------|----------------------------------------------------------------|-----------------------------------------------------|------------------------------------------------------------------------------------|
| COVID sample#1        | 54  | male   | Dexamethasone,<br>Remdesivir | 20          | Obese                                                          | Acute fibrinous organizing pneumonia                | Diffuse alveolar damage, overlapping features of exudative and proliferative phase |
| COVID sample#2        | 37  | male   |                              | 35          | alcoholic liver disease and micro nodular cirrhosis.           | Complications of COVID-19                           | Diffuse alveolar damage, overlapping features of exudative and proliferative phase |
| COVID sample#3        | 77  | female | Dexamethasone,<br>Remdesivir | 32          | Diabetes, Chronic Kidney disease, COPD<br>Obesity              | Complications of COVID-19                           | Diffuse alveolar damage, overlapping features of exudative and proliferative phase |
| COVID sample#4        | 74  | male   |                              | 25          | Diabetes, Dementia, Coronary artery disease<br>Hyperlipidemia, | Complications of COVID-19                           | Diffuse alveolar damage, predominantly proliferative phase                         |
| Non-COVID control #1  | 74  | male   | n/a                          | n/a         | Chronic obstructive pulmonary disease                          | Chronic obstructive pulmonary disease and pneumonia | Pneumonia                                                                          |
| Non-COVID control #2  | 67  | male   | n/a                          | n/a         | Myelodysplastic syndrome                                       | Pneumonia                                           | Diffuse fibrinous and organizing pneumonia                                         |
| Non-COVID control # 3 | 50  | male   | n/a                          | n/a         | Chronic kidney disease, sarcoidosis, chronic pancreatitis      | Cryptococcal pneumonia                              | Cryptococcal pneumonia                                                             |
